# Supplementary material for: Thouless quantum walks in topological flat bands.
Source: Research Square preprint supplement (doi:10.21203/rs.3.rs-6347811/v1), 2025-04-15
Supplement: Supplementary file 1 [file db4c244c348b4e0a2abd347f.pdf]

# Parity breaking in Thouless quantum walks

## Supplementary information

Carlo Danieli,<sup>1</sup> Laura Pilozi,<sup>1,2,\*</sup> Claudio Conti,<sup>3,2</sup> and Valentina Brosco<sup>1</sup>

<sup>1</sup>*Institute for Complex Systems, National Research Council (ISC-CNR), Via dei Taurini 19, 00185 Rome, Italy*

<sup>2</sup>*Research Center Enrico Fermi, Via Panisperna 89a, 00184 Rome, Italy*

<sup>3</sup>*Department of Physics, University of Sapienza, Piazzale Aldo Moro 5, 00185 Rome, Italy*

### PUMPING CYCLES $\mathcal{C}_{\mathcal{T}}^{++}$ , $\mathcal{C}_{\mathcal{T}}^{+-}$ AND $\mathcal{C}_{\mathcal{T}}^{-+}$

We detail the actions of the pumping cycles  $\mathcal{C}_{\mathcal{T}}^{\xi s}$  upon the symmetric and antisymmetric states  $|p_n\rangle = \frac{|c_n\rangle + |d_n\rangle}{\sqrt{2}}$  and  $|q_n\rangle = \frac{|c_n\rangle - |d_n\rangle}{\sqrt{2}}$ . These cycles  $\mathcal{C}_{\mathcal{T}}^{\xi s}$  are spherical triangles on the hyperplane  $J_c = J_d$  for  $s = +1$  and  $J_c = -J_d$  for  $s = -1$ , and have anti-clockwise orientation for  $\xi = +1$  and clockwise orientation for  $\xi = -1$ . Their corresponding holonomic transformations are

$$W_{\mathcal{C}_{\mathcal{T}}^{\xi s}} = e^{i\xi \frac{k}{2} (\sigma_0 - s\sigma_z)} \quad (1)$$

The four resulting cycles  $\mathcal{C}_{\mathcal{T}}^{++}$ ,  $\mathcal{C}_{\mathcal{T}}^{+-}$ ,  $\mathcal{C}_{\mathcal{T}}^{-+}$  and  $\mathcal{C}_{\mathcal{T}}^{--}$  are shown in Fig. 1(a,d,g,j) and they implement the following operators

$$\mathcal{C}_{\mathcal{T}}^{++} : \sum_n \left[ |p_{n+1}\rangle \langle p_n| + |q_n\rangle \langle q_n| \right] \quad \mathcal{C}_{\mathcal{T}}^{+-} : \sum_n \left[ |p_{n-1}\rangle \langle p_n| + |q_n\rangle \langle q_n| \right] \quad (2)$$

$$\mathcal{C}_{\mathcal{T}}^{+-} : \sum_n \left[ |p_n\rangle \langle p_n| + |q_{n+1}\rangle \langle q_n| \right] \quad \mathcal{C}_{\mathcal{T}}^{--} : \sum_n \left[ |p_n\rangle \langle p_n| + |q_{n-1}\rangle \langle q_n| \right] \quad (3)$$

as explicitly shown in Fig. 1

### QUANTUM WALK EQUATIONS AND QUASI-ENERGIES

For quantum walks  $\mathcal{C}_{\mathcal{R}}\mathcal{C}_{\mathcal{T}}^{\xi+}$ , the one time-step advancement from  $t$  to  $t+1$  in vector form reads

$$\begin{pmatrix} \psi_n^p(t+1) \\ \psi_n^q(t+1) \end{pmatrix} = \begin{pmatrix} \cos \theta & \sin \theta \\ 0 & 0 \end{pmatrix} \begin{pmatrix} \psi_{n-\xi}^p(t) \\ \psi_{n-\xi}^q(t) \end{pmatrix} + \begin{pmatrix} 0 & 0 \\ -\sin \theta & \cos \theta \end{pmatrix} \begin{pmatrix} \psi_n^p(t) \\ \psi_n^q(t) \end{pmatrix} \quad (4)$$

Subtract in both sides  $\begin{pmatrix} \psi_n^p(t) \\ \psi_n^q(t) \end{pmatrix}$  and add and subtract in the right hand side  $\begin{pmatrix} \cos \theta & \sin \theta \\ 0 & 0 \end{pmatrix} \begin{pmatrix} \psi_n^p(t) \\ \psi_n^q(t) \end{pmatrix}$ . By introducing the finite difference

$$\partial_t \begin{pmatrix} \psi_n^p(t) \\ \psi_n^q(t) \end{pmatrix} = \begin{pmatrix} \psi_n^p(t+1) \\ \psi_n^q(t+1) \end{pmatrix} - \begin{pmatrix} \psi_n^p(t) \\ \psi_n^q(t) \end{pmatrix} \quad -\xi \partial_n \begin{pmatrix} \psi_n^p(t) \\ \psi_n^q(t) \end{pmatrix} = \begin{pmatrix} \psi_{n-\xi}^p(t) \\ \psi_{n-\xi}^q(t) \end{pmatrix} - \begin{pmatrix} \psi_n^p(t) \\ \psi_n^q(t) \end{pmatrix} \quad (5)$$

Eq. (4) reads

$$\partial_t \begin{pmatrix} \psi_n^p(t) \\ \psi_n^q(t) \end{pmatrix} = -\xi \begin{pmatrix} \cos \theta & \sin \theta \\ 0 & 0 \end{pmatrix} \partial_n \begin{pmatrix} \psi_n^p(t) \\ \psi_n^q(t) \end{pmatrix} + \begin{pmatrix} \cos \theta & \sin \theta \\ -\sin \theta & \cos \theta \end{pmatrix} \begin{pmatrix} \psi_n^p(t) \\ \psi_n^q(t) \end{pmatrix} - \begin{pmatrix} \psi_n^p(t) \\ \psi_n^q(t) \end{pmatrix} \quad (6)$$

Via the Pauli matrixes  $\sigma_i$  and the identity matrix  $\sigma_0$ , Eq. (6) reads

$$\partial_t \begin{pmatrix} \psi_n^p(t) \\ \psi_n^q(t) \end{pmatrix} = -\xi \left[ \cos \theta \frac{\sigma_0 + \sigma_z}{2} + \sin \theta \frac{i\sigma_y + \sigma_x}{2} \right] \partial_n \begin{pmatrix} \psi_n^p(t) \\ \psi_n^q(t) \end{pmatrix} + [(\cos \theta - 1)\mathbb{I} + \sin \theta i\sigma_y] \begin{pmatrix} \psi_n^p(t) \\ \psi_n^q(t) \end{pmatrix} \quad (7)$$

For quantum walks  $\mathcal{C}_{\mathcal{R}}\mathcal{C}_{\mathcal{T}}^{\xi-}$ , the one time-step advancement from  $t$  to  $t+1$  in vector form reads

$$\begin{pmatrix} \psi_n^p(t+1) \\ \psi_n^q(t+1) \end{pmatrix} = \begin{pmatrix} 0 & 0 \\ -\sin \theta & \cos \theta \end{pmatrix} \begin{pmatrix} \psi_{n-\xi}^p(t) \\ \psi_{n-\xi}^q(t) \end{pmatrix} + \begin{pmatrix} \cos \theta & \sin \theta \\ 0 & 0 \end{pmatrix} \begin{pmatrix} \psi_n^p(t) \\ \psi_n^q(t) \end{pmatrix} \quad (8)$$

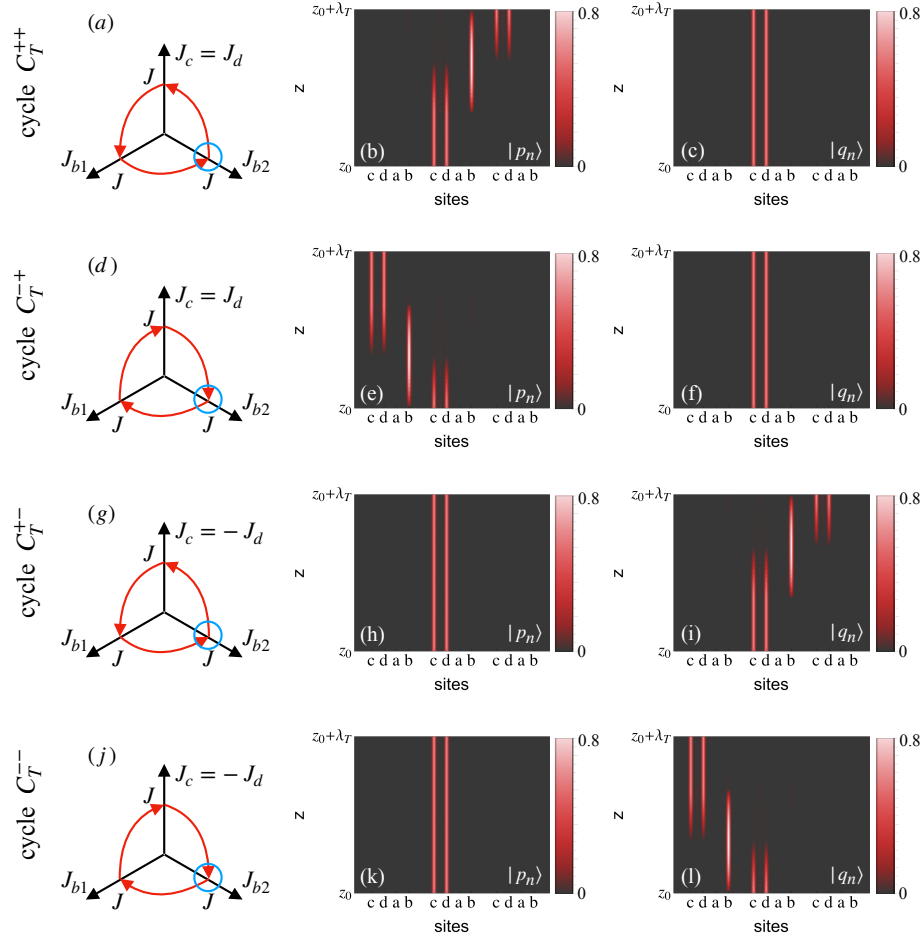

FIG. 1. (a) Sketch of cycle  $C_T^{++}$ . (b) and (c) Propagation of  $|p_n\rangle$  and  $|q_n\rangle$  respectively over one cycle period. The blue circles indicate the initial point. (d-f) Same as (a-c) for cycle  $C_T^{+-}$ . (g-i) Same as (a-c) for cycle  $C_T^{-+}$ . (j-l) Same as (a-c) for cycle  $C_T^{--}$ .

Alike in the previous case, subtracting in both sides  $\begin{pmatrix} \psi_n^p(t) \\ \psi_n^q(t) \end{pmatrix}$  and add and subtract in the right hand side  $\begin{pmatrix} 0 & 0 \\ -\sin\theta & \cos\theta \end{pmatrix} \begin{pmatrix} \psi_n^p(t) \\ \psi_n^q(t) \end{pmatrix}$ , Eq. (8) reads

$$\partial_t \begin{pmatrix} \psi_n^p(t) \\ \psi_n^q(t) \end{pmatrix} = -\xi \begin{pmatrix} 0 & 0 \\ -\sin\theta & \cos\theta \end{pmatrix} \partial_n \begin{pmatrix} \psi_n^p(t) \\ \psi_n^q(t) \end{pmatrix} + \begin{pmatrix} \cos\theta & \sin\theta \\ -\sin\theta & \cos\theta \end{pmatrix} \begin{pmatrix} \psi_n^p(t) \\ \psi_n^q(t) \end{pmatrix} - \begin{pmatrix} \psi_n^p(t) \\ \psi_n^q(t) \end{pmatrix} \quad (9)$$

Via the Pauli matrixes  $\sigma_i$  and the identity matrix  $\sigma_0$ , Eq. (9) reads

$$\partial_t \begin{pmatrix} \psi_n^p(t) \\ \psi_n^q(t) \end{pmatrix} = -\xi \left[ \cos\theta \frac{\sigma_0 - \sigma_z}{2} + \sin\theta \frac{i\sigma_y - \sigma_x}{2} \right] \partial_n \begin{pmatrix} \psi_n^p(t) \\ \psi_n^q(t) \end{pmatrix} + [(\cos\theta - 1)\mathbb{I} + \sin\theta i\sigma_y] \begin{pmatrix} \psi_n^p(t) \\ \psi_n^q(t) \end{pmatrix} \quad (10)$$

Hence, for quantum walks  $\mathcal{C}_{\mathcal{R}}C_T^{\xi s}$  the one time-step advancement from  $t$  to  $t+1$  in vector form reads

$$\partial_t \begin{pmatrix} \psi_n^p(t) \\ \psi_n^q(t) \end{pmatrix} = -\xi \left[ \cos\theta \frac{\sigma_0 + s\sigma_z}{2} + \sin\theta \frac{i\sigma_y + s\sigma_x}{2} \right] \partial_n \begin{pmatrix} \psi_n^p(t) \\ \psi_n^q(t) \end{pmatrix} + [(\cos\theta - 1)\mathbb{I} + \sin\theta i\sigma_y] \begin{pmatrix} \psi_n^p(t) \\ \psi_n^q(t) \end{pmatrix} \quad (11)$$

In k-space  $\tilde{\psi}_k(t) = \sum_n \psi_n(t)e^{ikn}$ , the one time-step advancement Eqs. (4,8) relative to a generic oriented quantum walk  $\mathcal{C}_{\mathcal{R}}C_T^{\xi s}$  reads

$$\tilde{\psi}_k(t+1) = M_k^{\xi s} \tilde{\psi}_k(t) \quad M_k^{\xi s} = \begin{pmatrix} e^{\frac{i}{2}\xi(s+1)k} \cos\theta & e^{\frac{i}{2}\xi(s+1)k} \sin\theta \\ -e^{-\frac{i}{2}\xi(s-1)k} \sin\theta & e^{-\frac{i}{2}\xi(s-1)k} \cos\theta \end{pmatrix} \quad (12)$$

For either  $s = +1$  and  $s = -1$ , their eigenvalues  $\lambda_{k,\theta}^{1,2}$  are

$$\lambda_{k,\theta}^{1,2} = e^{i\xi \frac{k}{2}} \left( \cos \theta \cos \frac{k}{2} \pm i \sqrt{1 - \cos^2 \theta \cos^2 \frac{k}{2}} \right) = e^{i\xi \frac{k}{2}} e^{\pm i\Omega_{k,\theta}} \quad (13)$$

which yield the relation for the quasi-energies  $\lambda_{k,\theta}^{1,2} = e^{iE_{k,\theta}^{1,2}}$

$$\cos E_{k,\theta}^{1,2} = \cos \left[ \frac{k}{2} \pm \Omega_{k,\theta} \right] \quad \Leftrightarrow \quad E_{k,\theta}^{1,2} = \xi \left[ \frac{k}{2} \pm \Omega_{k,\theta} \right] = \xi \left[ \frac{k}{2} \pm \arccos \left( \cos \theta \cos \frac{k}{2} \right) \right] \quad (14)$$

---

\* [laura.pilozzi@cnr.it](mailto:laura.pilozzi@cnr.it)

- [1] A. Nayak and A. Vishwanath, Quantum walk on the line, [arXiv preprint quant-ph/0010117](#) (2000).
- [2] A. Ambainis, E. Bach, A. Nayak, A. Vishwanath, and J. Watrous, One-dimensional quantum walks, in *Proceedings of the Thirty-Third Annual ACM Symposium on Theory of Computing*, STOC '01 (Association for Computing Machinery, New York, NY, USA, 2001) p. 37–49.
- [3] C. M. Bender and S. A. Orszag, Advanced mathematical methods for scientists and engineers i: Asymptotic methods and perturbation theory, Springer Science & Business Media , New York (2013).
- [4] N. Bleistein and R. A. Handelsman, Asymptotic expansions of integrals, Ardent Media , New York (1975).
- [5] A. Romanelli, Distribution of chirality in the quantum walk: Markov process and entanglement, [Phys. Rev. A](#) **81**, 062349 (2010).
